# Supplementary material
Source: PubMed Central journal article supplement (PMC3760570)
Supplement: Appendix_1.pdf [file Appendix_1.pdf]

## Appendix 1. Participating centres

|                                                           |                      |
|-----------------------------------------------------------|----------------------|
| Allgemeines Krankenhaus Viersen (Med. Klinik Kardiologie) | Viersen              |
| Asklepios Klinik Altona                                   | Hamburg              |
| ASKLEPIOS Kliniken Langen-Seligenstadt                    | Langen               |
| Augustinum Klinik München                                 | München              |
| Cardioangiologisches Centrum Bethanien – CCB              | Frankfurt a.M.       |
| Charite Campus Mitte                                      | Berlin               |
| Charite-Campus Virchow-Klinikum                           | Berlin               |
| Christliches Krankenhaus Quakenbrück                      | Quakenbrück          |
| Deutsches Herzzentrum München                             | München              |
| Diakonissenkrankenhaus Speyer (Innere Medizin)            | Speyer               |
| Elisabeth-Krankenhaus Essen                               | Essen                |
| Ev. Bathildiskrankenhaus Bad Pyrmont                      | Bad Pyrmont          |
| Ev. Krankenhaus Mülheim/Ruhr                              | Mülheim/Ruhr         |
| Evangelisches Krankenhaus Hamm                            | Hamm                 |
| Georg-August-Universität Göttingen                        | Göttingen            |
| GPR Klinikum Rüsselsheim                                  | Rüsselsheim          |
| Helios Kreiskrankenhaus Gotha                             | Gotha                |
| Herz- und Gefäßklinik Bad Neustadt/Saale                  | Bad Neustadt/Saale   |
| Herz- und Gefäßzentrum Khs Neu-Bethlehem                  | Göttingen            |
| Herz- und Kreislaufzentrum Rotenburg a.d. Fulda           | Rotenburg a.d. Fulda |
| Herzklinik Ulm                                            | Ulm                  |
| Herzzentrum Brandenburg                                   | Bernau               |
| Herzzentrum Ludwigshafen                                  | Ludwigshafen         |
| Kath. Kliniken Essen-Nord (St Vincenz)                    | Essen                |
| Katharinenhospital                                        | Unna                 |
| Kerckhoff-Klinik GmbH                                     | Bad Nauheim          |

|                                                       |                          |
|-------------------------------------------------------|--------------------------|
| KH Rothenburg ob der Tauber                           | Rothenburg ob der Tauber |
| Klinik Am Eichert                                     | Göppingen                |
| Klinikum Chemnitz gGmbH                               | Chemnitz                 |
| Klinikum Ernst von Bergmann Potsdam                   | Potsdam                  |
| Klinikum Ingolstadt (Med. Klinik I)                   | Ingolstadt               |
| Klinikum Karlsburg                                    | Karlsburg                |
| Klinikum Lippe-Detmold                                | Detmold                  |
| Klinikum Ludwigsburg-Bietigheim                       | Ludwigsburg              |
| Klinikum Saarbrücken                                  | Saarbrücken              |
| Klinikum Siloah                                       | Hannover                 |
| Klinikum Uckermark                                    | Schwedt/O.               |
| Klinikum Uelzen GmbH                                  | Uelzen                   |
| Krankenhaus der barmherzigen Brüder Trier             | Trier                    |
| Krankenhaus München – Neuperlach (Kardiologie)        | München                  |
| Krankenhaus St Franziskus Mönchengladbach             | Mönchengladbach          |
| Kreiskrankenhaus Bergstraße                           | Heppenheim               |
| Marienhause Klinikum St Elisabeth                     | Saarlouis                |
| Marienkrankenhaus Soest                               | Soest                    |
| Markus Krankenhaus (Med. III)                         | Frankfurt a.M.           |
| Med. Hochschule Hannover                              | Hannover                 |
| Ostalbkrankenhaus Aalen                               | Aalen                    |
| Philippusstift Essen                                  | Essen                    |
| Robert-Bosch-Krankenhaus                              | Stuttgart                |
| Schwarzwald-Baar-Klinikum Villingen-Schwenningen GmbH | Villingen-Schwenningen   |
| SLK-Kliniken Heilbronn                                | Heilbronn                |
| St Antonius Hospital Eschweiler                       | Eschweiler               |
| St Elisabeth Krankenhaus GmbH                         | Bad Kissingen            |

|                                                                           |                 |
|---------------------------------------------------------------------------|-----------------|
| St Josef-Hospital Bochum                                                  | Bochum          |
| St Marien Hospital Bonn                                                   | Bonn            |
| St Vincentius-Kliniken gAG                                                | Karlsruhe       |
| St Josefs-Krankenhaus Potsdam                                             | Potsdam         |
| Städt. Kliniken Neuss Lukaskrankenhaus                                    | Neuss           |
| Städt. Klinikum Brandenburg                                               | Brandenburg     |
| Städt. Klinikum Frankfurt Höchst                                          | Frankfurt a. M. |
| Städt. Klinikum Gütersloh                                                 | Gütersloh       |
| Städt. Klinikum Karlsruhe                                                 | Karlsruhe       |
| Städt. Klinikum Lüneburg                                                  | Lüneburg        |
| Städt. Klinikum München Klinik Bogenhausen                                | München         |
| Theresienkrankenhaus Mannheim                                             | Mannheim        |
| Uniklinik Erlangen (Med. Klinik II Kardiologie)                           | Erlangen        |
| Universitäres Herzzentrum Eppendorf                                       | Hamburg         |
| Universitätsklinik Rostock                                                | Rostock         |
| Universitätsklinikum Düsseldorf                                           | Düsseldorf      |
| Universitätsklinikum Essen (Klinik für Kardiologie)                       | Essen           |
| Universitätsklinikum Gießen und Marburg,<br>Standort Gießen – Kardiologie | Gießen          |
| Universitätsklinikum Heidelberg                                           | Heidelberg      |
| Universitätsklinikum Mannheim                                             | Mannheim        |
| Universitätsklinikum Münster – Herzzentrum Münster                        | Münster         |
| Universitätsklinikum Tübingen                                             | Tübingen        |
| Universitätsmedizin Mainz, 2. Med. Klinik                                 | Mainz           |
| Vinzenzkrankenhaus Hannover                                               | Hannover        |
| Vivantes Klinikum am Urban Berlin                                         | Berlin          |
| Vivantes Klinikum Neukölln Berlin                                         |                 |

Westpfalz-Klinikum Kaiserslautern

Kaiserslautern
